# Supplementary material for: Karst tiankengs as refugia for indigenous tree flora amidst a degraded landscape in southwestern China
Source: PubMed Central journal article supplement (PMC5484678; doi:10.1038/s41598-017-04592-x), 2017-06-26

# Karst Tiankengs as refugia for indigenous tree flora amidst a degraded landscape in southwestern China

Yuqiao Su, Qiming Tang, Fuyan Mo & Yuegui Xue\*

College of Life Sciences, Guangxi Normal University, Guilin 541006, Guangxi, China

## \*Corresponding author

Yuegui Xue (Y.X.): [xueyuegui@mailbox.gxnu.edu.cn](mailto:xueyuegui@mailbox.gxnu.edu.cn)

## Supplementary information

**Supplementary Table S1:** Checklist of tree species  $\geq 10$  cm diameter at breast height and their abundance by habitat from the study. Habitat code: CDTK = Chuandong Tiankeng; SMTK = Shenmu Tiankeng; FORE = Forest Remnants; FENG = Fengshui Woods.

**Supplementary Figure S1:** Species-level two-way cluster dendrogram. For species codes, see Supplementary Table S1.

**Supplementary Table S1.** Checklist of tree species  $\geq 10$  cm diameter at breast height and their abundance by habitat from the study. Habitat code: CDTK = Chuandong Tiankeng; SMTK = Shenmu Tiankeng; FORE = Forest Remnants; FENG = Fengshui Woods.

| Family         | SpID | SpCode | Species                                                   | Abundance by habitat |      |      |      |
|----------------|------|--------|-----------------------------------------------------------|----------------------|------|------|------|
|                |      |        |                                                           | CDTK                 | SMTK | FORE | FENG |
| Aceraceae      | 1    | ACECHI | <i>Acer chingii</i>                                       | 0                    | 4    | 0    | 0    |
| Aceraceae      | 2    | ACECOR | <i>Acer cordatum</i> var. <i>microcodatum</i>             | 3                    | 0    | 0    | 0    |
| Aceraceae      | 3    | ACETON | <i>Acer tonkinense</i> subsp. <i>kwangsiense</i>          | 0                    | 18   | 0    | 2    |
| Lauraceae      | 4    | ACTKWE | <i>Actinodaphne kweichowensis</i>                         | 5                    | 3    | 1    | 0    |
| Simarubaceae   | 5    | AILALT | <i>Ailanthus altissima</i>                                | 2                    | 0    | 0    | 0    |
| Ulmaceae       | 6    | APHASP | <i>Aphananthe aspera</i>                                  | 0                    | 1    | 0    | 0    |
| Cornaceae      | 7    | AUCHIM | <i>Aucuba himalaica</i> var. <i>himalaica</i>             | 0                    | 0    | 3    | 0    |
| Lauraceae      | 8    | BEIINT | <i>Beilschmiedia intermedia</i>                           | 0                    | 0    | 0    | 1    |
| Lauraceae      | 9    | BEIKWE | <i>Beilschmiedia kweichowensis</i>                        | 10                   | 8    | 0    | 0    |
| Betulaceae     | 10   | BETALN | <i>Betula alnoides</i>                                    | 0                    | 0    | 26   | 0    |
| Betulaceae     | 11   | BETAUS | <i>Betula austrosinensis</i>                              | 0                    | 3    | 0    | 0    |
| Betulaceae     | 12   | BETLUM | <i>Betula luminifera</i>                                  | 7                    | 1    | 0    | 0    |
| Moraceae       | 13   | BROPAP | <i>Broussonetia papyrifera</i>                            | 1                    | 0    | 0    | 0    |
| Corylaceae     | 14   | CARPOL | <i>Carpinus polyneura</i>                                 | 3                    | 3    | 0    | 0    |
| Corylaceae     | 15   | CARPUB | <i>Carpinus pubescens</i>                                 | 0                    | 0    | 8    | 13   |
| Fagaceae       | 16   | CASCHI | <i>Castanopsis chinensis</i>                              | 0                    | 0    | 0    | 3    |
| Ulmaceae       | 17   | CELBIO | <i>Celtis biondii</i>                                     | 5                    | 5    | 0    | 1    |
| Ulmaceae       | 18   | CELCER | <i>Celtis cerasifera</i> .                                | 0                    | 0    | 7    | 8    |
| Ulmaceae       | 19   | CELTET | <i>Celtis tetrandra</i> ssp. <i>Sinensis</i>              | 0                    | 2    | 0    | 0    |
| Rosaceae       | 20   | CERCAM | <i>Cerasus campanulata</i>                                | 1                    | 3    | 0    | 5    |
| Rosaceae       | 21   | CERPSE | <i>Cerasus pseudocerasus</i>                              | 0                    | 0    | 4    | 14   |
| Anacardiaceae  | 22   | CHOAXI | <i>Choerospondias axillaris</i>                           | 5                    | 6    | 6    | 7    |
| Lauraceae      | 23   | CINBUR | <i>Cinnamomum burmanii</i>                                | 0                    | 4    | 0    | 0    |
| Lauraceae      | 24   | CINSAX | <i>Cinnamomum saxatile</i>                                | 2                    | 7    | 1    | 2    |
| Rutaceae       | 25   | CLAEMA | <i>Clausena emarginata</i>                                | 4                    | 1    | 0    | 0    |
| Verbenaceae    | 26   | CLECYR | <i>Clerodendrum cyrtophyllum</i> var. <i>cyrtophyllum</i> | 0                    | 0    | 6    | 0    |
| Cornaceae      | 27   | CORCON | <i>Cornus controversa</i>                                 | 0                    | 0    | 12   | 2    |
| Coriariaceae   | 28   | CORNEP | <i>Coriaria nepalensis</i>                                | 0                    | 0    | 8    | 0    |
| Lauraceae      | 29   | CRYCON | <i>Cryptocarya concinna</i>                               | 7                    | 5    | 0    | 0    |
| Fagaceae       | 30   | CYCARG | <i>Cyclobalanopsis argyrotricha</i>                       | 2                    | 0    | 0    | 0    |
| Fagaceae       | 31   | CYCAUS | <i>Cyclobalanopsis austroglauca</i>                       | 5                    | 0    | 0    | 0    |
| Fagaceae       | 32   | CYCGLA | <i>Cyclobalanopsis glauca</i>                             | 7                    | 10   | 0    | 68   |
| Fagaceae       | 33   | CYCJEN | <i>Cyclobalanopsis jenseniana</i>                         | 4                    | 2    | 0    | 0    |
| Araliaceae     | 34   | DENDEN | <i>Dendropanax dentiger</i>                               | 0                    | 4    | 0    | 0    |
| Ebenaceae      | 35   | DIOMOR | <i>Diospyros morrisiana</i>                               | 1                    | 0    | 0    | 0    |
| Elaeocarpaceae | 36   | ELAJAP | <i>Elaeocarpus japonicus</i>                              | 2                    | 4    | 0    | 0    |

| Family         | SpID | SpCode | Species                                             | Abundance by habitat |      |      |      |
|----------------|------|--------|-----------------------------------------------------|----------------------|------|------|------|
|                |      |        |                                                     | CDTK                 | SMTK | FORE | FENG |
| Juglandaceae   | 37   | ENGROX | <i>Engelhardia roxburghiana</i>                     | 5                    | 4    | 0    | 0    |
| Celastraceae   | 38   | EUODIE | <i>Euonymus dielsianus</i>                          | 0                    | 1    | 0    | 0    |
| Celastraceae   | 39   | EUOECH | <i>Euonymus echinatus</i>                           | 0                    | 2    | 0    | 0    |
| Celastraceae   | 40   | EUOMYR | <i>Euonymus myrianthus</i>                          | 0                    | 0    | 0    | 1    |
| Staphyleaceae  | 41   | EUSJAP | <i>Euscaphis japonica</i>                           | 0                    | 2    | 0    | 0    |
| Moraceae       | 42   | FICFIS | <i>Ficus fistulosa</i>                              | 4                    | 0    | 0    | 0    |
| Moraceae       | 43   | FICHEN | <i>Ficus henryi</i>                                 | 3                    | 0    | 0    | 0    |
| Sapindaceae    | 44   | HANBOD | <i>Handeliodendron bodinieri</i>                    | 8                    | 15   | 11   | 13   |
| Cornaceae      | 45   | HELJAP | <i>Helwingia japonica</i>                           | 0                    | 2    | 0    | 0    |
| Rhamnaceae     | 46   | HOVACE | <i>Hovenia acerba</i>                               | 0                    | 0    | 0    | 2    |
| Aquifoliaceae  | 47   | ILEMAC | <i>Ilex macrocarpa</i> var. <i>longipedunculata</i> | 0                    | 5    | 0    | 0    |
| Escalloniaceae | 48   | ITEYUN | <i>Itea yunnanensis</i>                             | 0                    | 0    | 0    | 4    |
| Juglandaceae   | 49   | JUGREG | <i>Juglans regia</i>                                | 0                    | 0    | 0    | 6    |
| Rosaceae       | 50   | LAUFOR | <i>Laurocerasus fordiana</i>                        | 0                    | 0    | 1    | 0    |
| Oleaceae       | 51   | LIGLUC | <i>Ligustrum lucidum</i>                            | 0                    | 2    | 0    | 0    |
| Lauraceae      | 52   | LINGLA | <i>Lindera glauca</i>                               | 9                    | 6    | 0    | 0    |
| Lauraceae      | 53   | LINMEG | <i>Lindera megaphylla</i>                           | 0                    | 0    | 6    | 0    |
| Lauraceae      | 54   | LINPUL | <i>Lindera pulcherrima</i> var. <i>hemsleyana</i>   | 0                    | 1    | 5    | 5    |
| Lauraceae      | 55   | LITCUB | <i>Litsea cubeba</i>                                | 0                    | 0    | 7    | 0    |
| Lauraceae      | 56   | LITELO | <i>Litsea elongata</i>                              | 8                    | 5    | 0    | 0    |
| Fagaceae       | 57   | LITMEG | <i>Lithocarpus megalophyllus</i>                    | 0                    | 1    | 0    | 0    |
| Fagaceae       | 58   | LITSIL | <i>Lithocarpus silvicularum</i>                     | 5                    | 4    | 0    | 0    |
| Lauraceae      | 59   | MACCAL | <i>Machilus calcicola</i>                           | 12                   | 11   | 0    | 0    |
| Lauraceae      | 60   | MACCHI | <i>Machilus chinensis</i>                           | 1                    | 2    | 0    | 0    |
| Lauraceae      | 61   | MACGLA | <i>Machilus glaucifolia</i>                         | 5                    | 15   | 0    | 0    |
| Lauraceae      | 62   | MACMUL | <i>Machilus multinervia</i>                         | 0                    | 0    | 63   | 18   |
| Lauraceae      | 63   | MACORE | <i>Machilus oreophila</i>                           | 2                    | 1    | 0    | 0    |
| Olacaceae      | 64   | MALOLE | <i>Malania oleifera</i>                             | 0                    | 2    | 0    | 0    |
| Euphorbiaceae  | 65   | MALPHI | <i>Mallotus philippinensis</i>                      | 0                    | 0    | 0    | 1    |
| Magnoliaceae   | 66   | MANARO | <i>Manglietia aromatica</i>                         | 3                    | 5    | 0    | 0    |
| Araliaceae     | 67   | METDAV | <i>Metapanax davidii</i>                            | 0                    | 3    | 0    | 3    |
| Magnoliaceae   | 68   | MICMAR | <i>Michelia martinii</i>                            | 0                    | 3    | 0    | 0    |
| Lauraceae      | 69   | NEOCON | <i>Neolitsea confertifolia</i>                      | 5                    | 5    | 0    | 0    |
| Rhamnaceae     | 70   | PALHEM | <i>Paliurus hemsleyanus</i>                         | 0                    | 5    | 0    | 0    |
| Rosaceae       | 71   | PHOBEA | <i>Photinia beauverdiana</i>                        | 2                    | 4    | 0    | 0    |
| Lauraceae      | 72   | PHOBOU | <i>Phoebe bournei</i>                               | 0                    | 0    | 1    | 0    |
| Lauraceae      | 73   | PHONAN | <i>Phoebe nanmu</i>                                 | 2                    | 3    | 0    | 0    |
| Pinaceae       | 74   | PINMAS | <i>Pinus massoniana</i>                             | 2                    | 0    | 0    | 0    |
| Pittosporaceae | 75   | PITPUL | <i>Pittosporum pulchrum</i>                         | 0                    | 0    | 0    | 1    |
| Juglandaceae   | 76   | PLALON | <i>Platycarya longipes</i>                          | 16                   | 20   | 28   | 12   |

| Family         | SpID | SpCode | Species                                                  | Abundance by habitat |      |      |      |
|----------------|------|--------|----------------------------------------------------------|----------------------|------|------|------|
|                |      |        |                                                          | CDTK                 | SMTK | FORE | FENG |
| Pinaceae       | 77   | PSEBRE | <i>Pseudotsuga brevifolia</i>                            | 21                   | 4    | 0    | 2    |
| Fagaceae       | 78   | QUEPHI | <i>Quercus phillyraeoides</i>                            | 9                    | 2    | 0    | 0    |
| Anacardiaceae  | 79   | RHUCHI | <i>Rhus chinensis</i> var. <i>chinensis</i>              | 0                    | 0    | 19   | 0    |
| Euphorbiaceae  | 80   | SAPROT | <i>Sapium rotundifolium</i>                              | 2                    | 0    | 0    | 0    |
| Araliaceae     | 81   | SCHBRE | <i>Schefflera brevipedicellata</i>                       | 15                   | 14   | 0    | 0    |
| Olacaceae      | 82   | SCHJAS | <i>Schoepfia jasminodora</i>                             | 0                    | 2    | 0    | 0    |
| Araliaceae     | 83   | SCHMIN | <i>Schefflera minutistellata</i>                         | 0                    | 0    | 1    | 0    |
| Sapotaceae     | 84   | SINPED | <i>Sinosideroxylon pedunculatum</i>                      | 3                    | 2    | 0    | 0    |
| Sterculiaceae  | 85   | STELAN | <i>Sterculia lanceolata</i>                              | 0                    | 0    | 0    | 2    |
| Symplocaceae   | 86   | SYMSUM | <i>Symplocos sumuntia</i>                                | 3                    | 0    | 0    | 0    |
| Myrtaceae      | 87   | SYZBUX | <i>Syzygium buxifolium</i> var. <i>buxifolium</i>        | 4                    | 0    | 0    | 0    |
| Linaceae       | 88   | TIROVO | <i>Tirpitzia ovoidea</i>                                 | 0                    | 0    | 0    | 1    |
| Meliaceae      | 89   | TOOSIN | <i>Toona sinensis</i>                                    | 0                    | 2    | 6    | 5    |
| Anacardiaceae  | 90   | TOXSUC | <i>Toxicodendron succedaneum</i> var. <i>succedaneum</i> | 2                    | 0    | 0    | 0    |
| Staphyleaceae  | 91   | TURMON | <i>Turpinia montana</i>                                  | 0                    | 0    | 0    | 7    |
| Ulmaceae       | 92   | ULMPAR | <i>Ulmus parvifolia</i>                                  | 1                    | 4    | 0    | 0    |
| Caprifoliaceae | 93   | VIBCYL | <i>Viburnum cylindricum</i>                              | 0                    | 0    | 1    | 1    |
| Caprifoliaceae | 94   | VIBPRO | <i>Viburnum propinquum</i>                               | 6                    | 0    | 0    | 0    |
| Caprifoliaceae | 95   | VIBTER | <i>Viburnum ternatum</i>                                 | 0                    | 1    | 0    | 0    |
| Rubiaceae      | 96   | WENUVA | <i>Wendlandia uvariifolia</i>                            | 0                    | 4    | 0    | 0    |
| Total          |      |        |                                                          | 234                  | 258  | 231  | 210  |

**Supplementary Figure S1:** Species-level two-way cluster dendrogram. For species codes, see Supplementary Table S1.

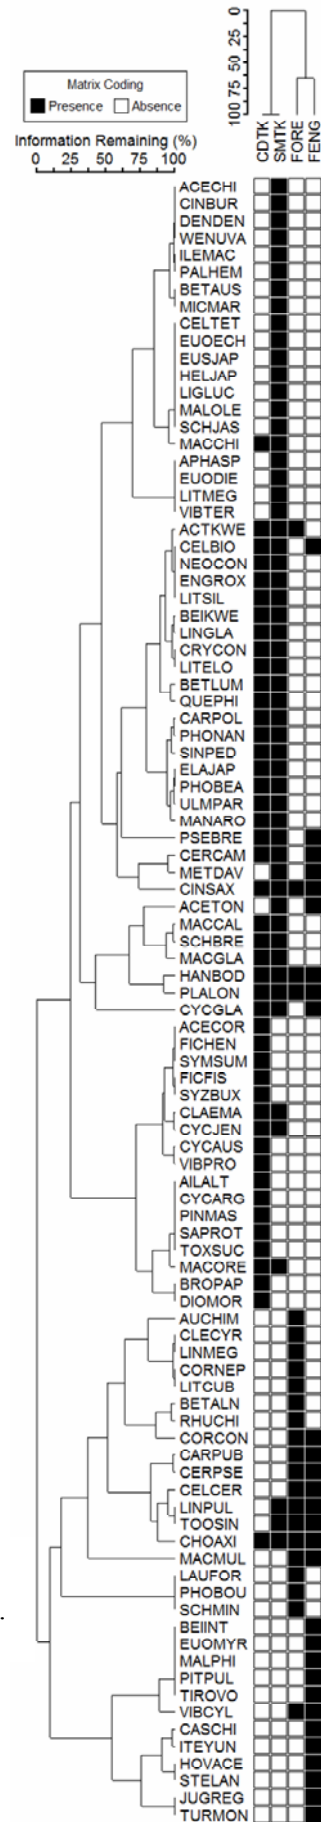

Supplement: 41598_2017_4592_MOESM1_ESM.pdf [file 41598_2017_4592_MOESM1_ESM.pdf]
